# Supplementary material for: Influences of Lake Malawi on the spatial and diurnal variability of local precipitation
Source: Copernicus journal article supplement (doi:10.5194/hess-23-2795-2019), 2019-07-05
Supplement: Supplementary file 1 [file hess-23-2795-2019-supplement.pdf]

Supplement of Hydrol. Earth Syst. Sci., 23, 2795–2812, 2019  
<https://doi.org/10.5194/hess-23-2795-2019-supplement>  
© Author(s) 2019. This work is distributed under  
the Creative Commons Attribution 4.0 License.

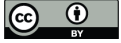

*Supplement of*

## **Influences of Lake Malawi on the spatial and diurnal variability of local precipitation**

**Shunya Koseki and Priscilla A. Mooney**

*Correspondence to:* Shunya Koseki ([shunya.koseki@gfi.uib.no](mailto:shunya.koseki@gfi.uib.no))

The copyright of individual parts of the supplement might differ from the CC BY 4.0 License.

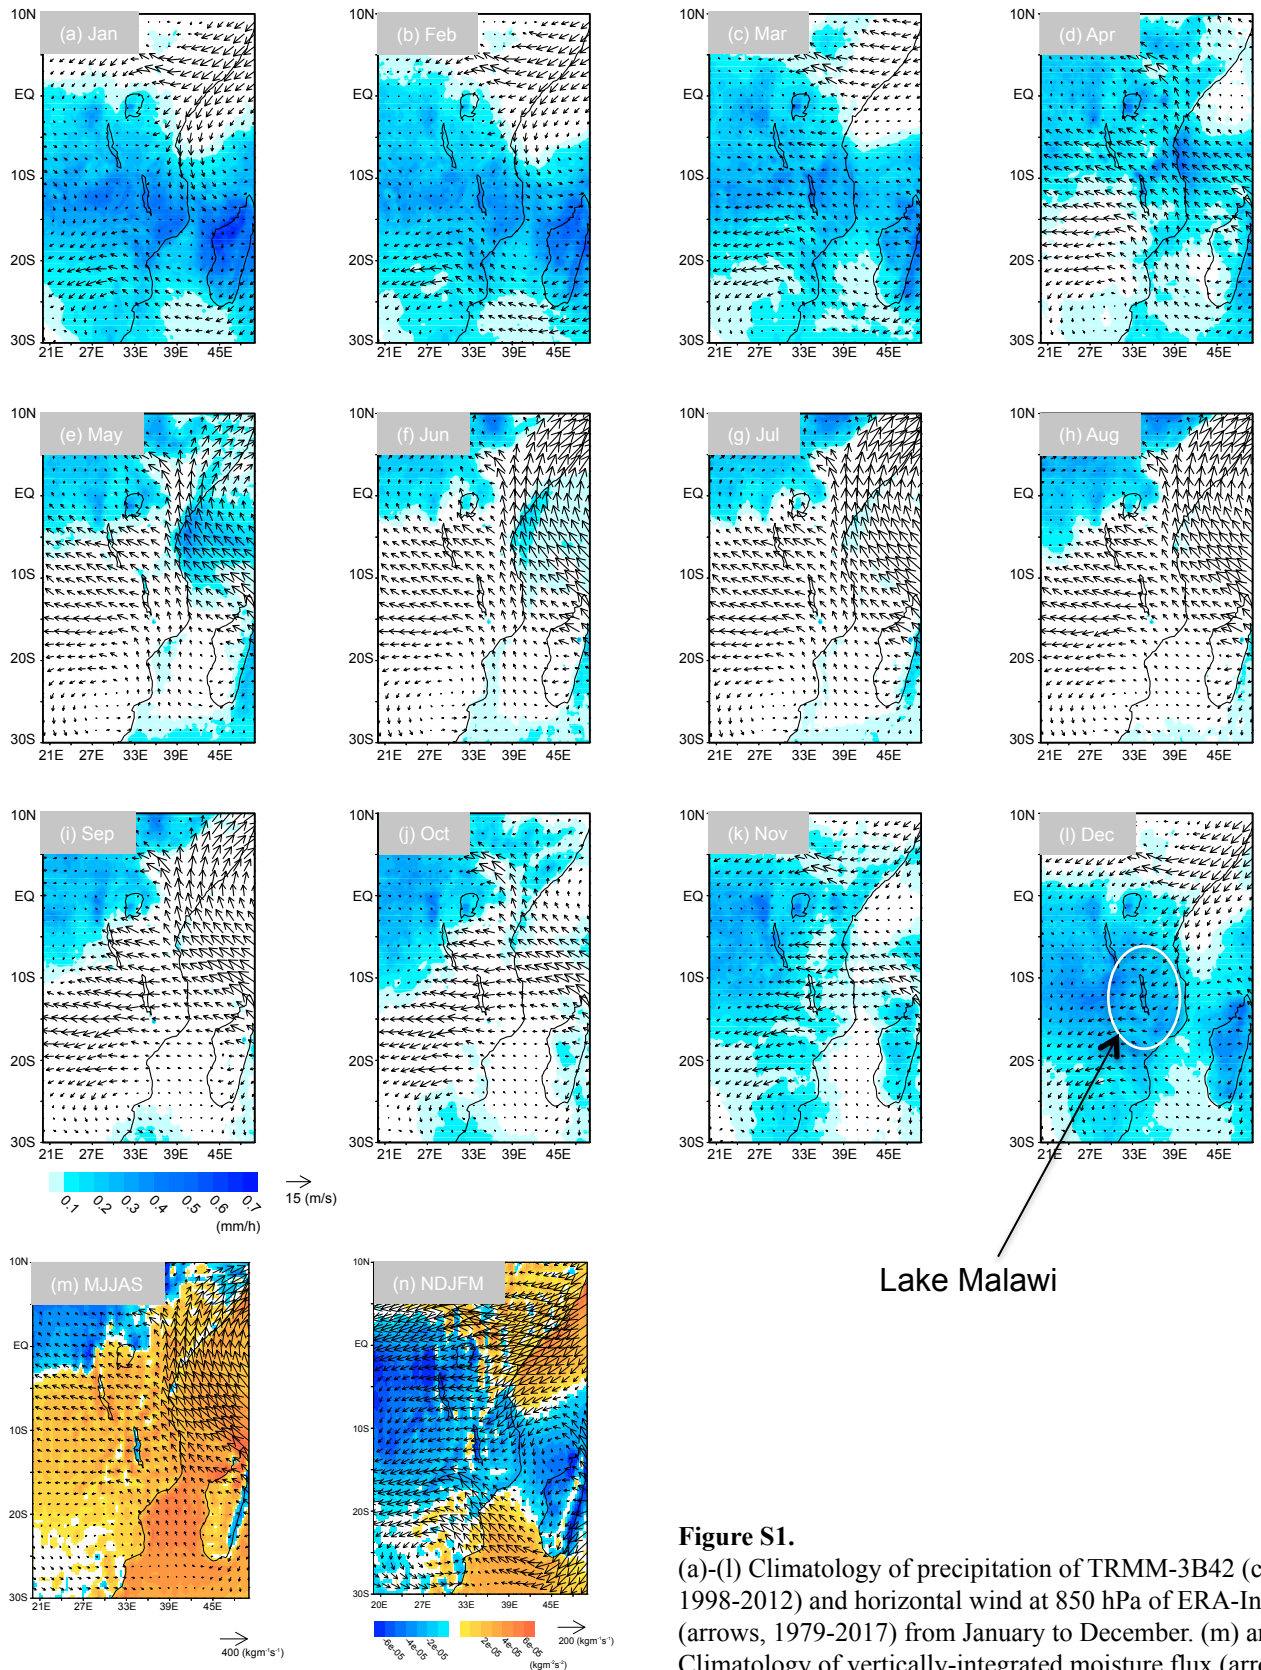

**Figure S1.** (a)-(l) Climatology of precipitation of TRMM-3B42 (color, 1998-2012) and horizontal wind at 850 hPa of ERA-Interim (arrows, 1979-2017) from January to December. (m) and (n) Climatology of vertically-integrated moisture flux (arrows) and its divergence (color) of ERA-Interim (1979-2017) for MJJAS and NDJFM mean.
